# Supplementary material for: Mechanical response microRNA-145a-5p alleviates osteoarthritis by inhibiting inflammation and promoting chondrogenesis
Source: PeerJ. 2025 Aug 19;13:e19905. doi: 10.7717/peerj.19905 (PMC12372789; doi:10.7717/peerj.19905)
Supplement: Supplemental Information 1 [file peerj-13-19905-s001.xlsx]

## Sheet: Figure1C
	Sample	miR-145a-5p	Ct U6	∆Ct	∆∆Ct	2^-∆∆Ct	mean 2^-∆∆Ct
Sham	Sample1	20.035	21.8694	-1.9922	-0.0916443	1.06558	1.00217
	Sample2	20.2584	22.0132	-1.76881	0.131744	0.912727
	Sample3	20.0866	22.1991	-1.94065	-0.0401001	1.02819
OA	Sample1	31.2319	30.7095	0.481871	2.38242	0.191787	0.23989
	Sample2	30.3005	30.4109	-0.449545	1.45101	0.365766
	Sample3	31.4744	31.1297	0.724335	2.62489	0.162118

## Sheet: Figure2A
	Sample	miR-145a-5p	Ct U6	∆Ct	∆∆Ct	2^-∆∆Ct	mean 2^-∆∆Ct
0	Sample1	23.168	20.3002	2.79384	0.155212	0.898001	1.003
	Sample2	22.9052	20.3995	2.53101	-0.107623	1.07745
	Sample3	22.9652	20.4227	2.59104	-0.047589	1.03354
2	Sample1	22.0775	20.4456	2.08988	-0.548754	1.46282	1.54461
	Sample2	21.968	19.8264	1.98037	-0.658258	1.57818
	Sample3	21.9546	19.6907	1.96703	-0.6716	1.59284
4	Sample1	20.7162	18.8402	1.96639	-0.672245	1.59355	1.53546
	Sample2	20.7335	18.634	1.98373	-0.654902	1.57451
	Sample3	20.864	18.7752	2.11423	-0.524399	1.43833
6	Sample1	20.4586	18.7815	1.69341	-0.945222	1.92549	1.97954
	Sample2	20.3633	18.5911	1.5981	-1.04053	2.05698
	Sample3	20.4358	18.9229	1.6706	-0.968026	1.95616
8	Sample1	20.9044	19.8494	0.988606	-1.65003	3.13839	3.52534
	Sample2	20.6992	19.8418	0.783433	-1.8552	3.61802
	Sample3	20.621	20.0561	0.705199	-1.93343	3.81963

## Sheet: Figure2C-I
	Sample	miR-145a-5p	Ct U6	∆Ct	∆∆Ct	2^-∆∆Ct	mean 2^-∆∆Ct
miR-NC	Sample1	27.9897	25.7609	2.32372	-0.121042	1.08752	1.00342
	Sample2	28.2744	25.6786	2.60842	0.163659	0.892758
	Sample3	28.0682	25.5586	2.40214	-0.0426172	1.02998
miR-inhibitor	Sample1	24.7633	20.5878	4.46501	2.02025	0.246515	0.287639
	Sample2	24.3605	19.9326	4.06218	1.61742	0.325917
	Sample3	24.5266	20.3746	4.22822	1.78346	0.290485
miR-mimic	Sample1	15.6365	20.8016	-5.22347	-7.66823	203.408	192.165
	Sample2	15.7834	21.4245	-5.07659	-7.52135	183.718
	Sample3	15.7397	20.3538	-5.12029	-7.56505	189.368
	Sample	Sox9	Ct Gapdh	∆Ct	∆∆Ct	2^-∆∆Ct	mean 2^-∆∆Ct
miR-NC	Sample1	24.7873	20.5912	4.31164	0.42653	0.744049	1.02117
	Sample2	24.1863	20.5526	3.71065	-0.174457	1.12854
	Sample3	24.1087	20.283	3.63304	-0.252073	1.19092
miR-inhibitor	Sample1	24.4383	21.452	2.90762	-0.977486	1.96903	1.9385
	Sample2	24.4612	21.2752	2.93057	-0.954542	1.93796
	Sample3	24.4833	21.8648	2.95266	-0.932449	1.90851
miR-mimic	Sample1	24.6281	24.3078	-0.0107117	-3.89582	14.8853	14.7718
	Sample2	24.9228	24.9377	0.284004	-3.6011	12.135
	Sample3	24.4116	24.6709	-0.227179	-4.11229	17.2951
	Sample	Acan	Ct Gapdh	∆Ct	∆∆Ct	2^-∆∆Ct	mean 2^-∆∆Ct
miR-NC	Sample1	25.0956	20.5912	4.61997	0.0924511	0.937928	1.00126
	Sample2	24.9188	20.5526	4.44314	-0.0843697	1.06022
	Sample3	24.9951	20.283	4.51943	-0.00808144	1.00562
miR-inhibitor	Sample1	24.4341	21.452	2.90348	-1.62404	3.08236	2.90331
	Sample2	24.5027	21.2752	2.97209	-1.55542	2.93919
	Sample3	24.6314	21.8648	3.10078	-1.42673	2.68837
miR-mimic	Sample1	24.8765	24.3078	0.237652	-4.28986	19.5604	21.1572
	Sample2	24.7438	24.9377	0.105028	-4.42249	21.4438
	Sample3	24.6766	24.6709	0.0377541	-4.48976	22.4674
	Sample	Col2	Ct Gapdh	∆Ct	∆∆Ct	2^-∆∆Ct	mean 2^-∆∆Ct
miR-NC	Sample1	30.7174	20.5912	10.2417	-0.334264	1.26073	1.01984
	Sample2	31.4211	20.5526	10.9455	0.369481	0.774061
	Sample3	31.0164	20.283	10.5408	-0.0352166	1.02471
miR-inhibitor	Sample1	31.4935	21.452	9.96281	-0.613192	1.52964	1.41062
	Sample2	31.9334	21.2752	10.4028	-0.173216	1.12757
	Sample3	31.4516	21.8648	9.92096	-0.655037	1.57466
miR-mimic	Sample1	31.3603	24.3078	6.72151	-3.85449	14.4649	20.1751
	Sample2	31.0565	24.9377	6.41775	-4.15825	17.855
	Sample3	30.3969	24.6709	5.7581	-4.8179	28.2054
	Sample	Nrf2	Ct Gapdh	∆Ct	∆∆Ct	2^-∆∆Ct	mean 2^-∆∆Ct
miR-NC	Sample1	19.8149	13.1797	6.71816	0.24125	0.846012	1.00762
	Sample2	19.3848	13.0118	6.28808	-0.188836	1.13984
	Sample3	19.5212	13.0987	6.4245	-0.0524133	1.037
miR-inhibitor	Sample1	19.7846	14.178	5.96788	-0.509034	1.4231	1.42701
	Sample2	19.7644	13.6145	5.94767	-0.529243	1.44317
	Sample3	19.793	13.6575	5.97634	-0.500572	1.41477
miR-mimic	Sample1	20.2708	13.1278	7.08571	0.608791	0.655746	0.670812
	Sample2	20.0655	13.167	6.88039	0.403473	0.756036
	Sample3	20.3974	13.2605	7.21231	0.735397	0.600653
	Sample	Il-6	Ct Gapdh	∆Ct	∆∆Ct	2^-∆∆Ct	mean 2^-∆∆Ct
miR-NC	Sample1	17.7509	13.1797	4.65421	0.087616	0.941077	1.00272
	Sample2	17.515	13.0118	4.41826	-0.148335	1.10829
	Sample3	17.724	13.0987	4.62732	0.0607185	0.958786
miR-inhibitor	Sample1	16.5888	13.1306	3.53221	-1.03439	2.04825	1.8755
	Sample2	16.6032	12.9891	3.54655	-1.02005	2.02798
	Sample3	16.9907	13.0503	3.93409	-0.632506	1.55026
miR-mimic	Sample1	18.678	13.1278	5.49291	0.926315	0.526201	0.450488
	Sample2	18.7784	13.167	5.5933	1.0267	0.490832
	Sample3	19.3319	13.2605	6.14682	1.58022	0.334431

## Sheet: Figure3C
	Sample	miR-145a-5p	Ct U6	∆Ct	∆∆Ct	2^-∆∆Ct	mean 2^-∆∆Ct
Ctrl	Sample1	28.3894	25.7726	2.95045	-0.0950069	1.06807	1.00132
	Sample2	28.4944	24.9715	3.05538	0.00991821	0.993149
	Sample3	28.5695	25.5729	3.13055	0.0850887	0.942727
IL-1b	Sample1	28.4396	25.0626	3.55997	0.514513	0.700029	0.678814
	Sample2	28.2579	25.3647	3.37831	0.33285	0.793967
	Sample3	28.8075	24.2116	3.92791	0.882446	0.542447
	Sample	Sox9	Ct Gapdh	∆Ct	∆∆Ct	2^-∆∆Ct	mean 2^-∆∆Ct
Ctrl	Sample1	24.7621	15.6087	9.05284	0.0312297	0.978586	1.00012
	Sample2	24.7098	15.7097	9.00059	-0.0210241	1.01468
	Sample3	24.7207	15.8093	9.01141	-0.0102056	1.0071
IL-1b	Sample1	25.2623	15.4401	9.65575	0.63414	0.644325	0.632405
	Sample2	25.3165	15.673	9.70997	0.688358	0.62056
	Sample3	25.2894	15.7066	9.68286	0.661249	0.632331
	Sample	Acan	Ct Gapdh	∆Ct	∆∆Ct	2^-∆∆Ct	mean 2^-∆∆Ct
Ctrl	Sample1	29.3701	21.7634	7.54651	0.300655	0.811884	1.01052
	Sample2	28.9275	21.8625	7.10394	-0.141915	1.10337
	Sample3	28.9107	21.8448	7.08711	-0.15874	1.11631
IL-1b	Sample1	32.0409	22.9503	9.06232	1.81647	0.283915	0.294118
	Sample2	31.9079	22.964	8.92928	1.68343	0.311341
	Sample3	32.0249	23.0216	9.04624	1.80039	0.287097
	Sample	Col2	Ct Gapdh	∆Ct	∆∆Ct	2^-∆∆Ct	mean 2^-∆∆Ct
Ctrl	Sample1	32.9515	21.7634	11.128	-0.0843137	1.06018	1.01961
	Sample2	33.4244	21.8625	11.6008	0.38851	0.763918
	Sample3	32.7317	21.8448	10.9081	-0.304197	1.23473
IL-1b	Sample1	35.5908	22.9503	12.6122	1.39989	0.378957	0.367678
	Sample2	35.9132	22.964	12.9346	1.72232	0.30306
	Sample3	35.439	23.0216	12.4604	1.24805	0.421016

## Sheet: Figure3D
	Sample	Sox9	Ct Gapdh	∆Ct	∆∆Ct	2^-∆∆Ct	mean 2^-∆∆Ct
miR-NC	Sample1	26.4884	14.8596	11.5535	0.268806	0.830006	1.00957
	Sample2	26.0045	14.9679	11.0696	-0.215087	1.16077
	Sample3	26.1658	14.9771	11.231	-0.0537192	1.03794
miR-NC+il-1b	Sample1	26.2972	14.4532	11.8578	0.573102	0.67217	0.607524
	Sample2	26.6573	14.3953	12.218	0.933267	0.523671
	Sample3	26.3981	14.4696	11.9588	0.674085	0.62673
miR-mimic	Sample1	24.6608	14.8157	9.7728	-1.5119	2.85186	2.94693
	Sample2	24.5433	14.8636	9.65531	-1.62939	3.09382
	Sample3	24.6391	14.9848	9.75108	-1.53362	2.89511
miR-mimic+il-1b	Sample1	24.8704	14.9801	9.87317	-1.41153	2.66019	2.25261
	Sample2	25.0149	15.0287	10.0177	-1.26704	2.40667
	Sample3	25.5241	14.9829	10.5269	-0.757839	1.69096
	Sample	Col2	Ct Gapdh	∆Ct	∆∆Ct	2^-∆∆Ct	mean 2^-∆∆Ct
miR-NC	Sample1	18.6617	14.8596	3.72689	0.0552069	0.962456	1.00036
	Sample2	18.5787	14.9679	3.64383	-0.0278505	1.01949
	Sample3	18.5792	14.9771	3.64433	-0.0273565	1.01914
miR-NC+il-1b	Sample1	18.5474	14.4532	4.10803	0.436351	0.739002	0.61657
	Sample2	18.9474	14.3953	4.50806	0.836381	0.560047
	Sample3	18.9718	14.4696	4.53245	0.860766	0.55066
miR-mimic	Sample1	17.6592	14.8157	2.7712	-0.900486	1.86669	1.85595
	Sample2	17.5751	14.8636	2.68711	-0.984571	1.97873
	Sample3	17.7753	14.9848	2.88723	-0.784458	1.72244
miR-mimic+il-1b	Sample1	17.6756	14.9801	2.67834	-0.99334	1.99079	1.92258
	Sample2	17.7697	15.0287	2.77247	-0.899218	1.86505
	Sample3	17.7339	14.9829	2.73667	-0.935009	1.9119
	Sample	Acan	Ct Gapdh	∆Ct	∆∆Ct	2^-∆∆Ct	mean 2^-∆∆Ct
miR-NC	Sample1	18.6066	14.8596	3.67179	0.0181936	0.987468	1.00067
	Sample2	18.5169	14.9679	3.58205	-0.0715434	1.05084
	Sample3	18.6418	14.9771	3.70694	0.0533498	0.963696
miR-NC+il-1b	Sample1	18.1348	14.4532	3.69549	0.0418981	0.971376	0.935293
	Sample2	18.243	14.3953	3.8036	0.150007	0.901246
	Sample3	18.1926	14.4696	3.75325	0.0996526	0.933258
miR-mimic	Sample1	17.9947	14.8157	3.10671	-0.546885	1.46093	1.3749
	Sample2	18.1809	14.8636	3.2929	-0.360698	1.28405
	Sample3	18.0772	14.9848	3.1892	-0.464391	1.37973
miR-mimic+il-1b	Sample1	18.3089	14.9801	3.31165	-0.341942	1.26746	1.23877
	Sample2	18.3125	15.0287	3.31526	-0.338333	1.26429
	Sample3	18.4065	14.9829	3.40923	-0.24436	1.18457

## Sheet: Figure4
	Sample	miR-145a-5p	Ct U6	∆Ct	∆∆Ct	2^-∆∆Ct	mean 2^-∆∆Ct
Control	Sample1	25.9962	26.4328	-0.806074	0.169238	0.889312	1.00379
	Sample2	25.792	27.4523	-1.01026	-0.0349509	1.02452
	Sample3	25.6927	26.5217	-1.1096	-0.134288	1.09755
10%stretch	Sample1	23.1171	25.9627	-2.2958	-1.32049	2.49751	2.3583
	Sample2	23.1887	25.0283	-2.22417	-1.24886	2.37654
	Sample3	23.2995	25.2477	-2.11337	-1.13806	2.20085
Control	Sample1	17.8461	16.7854	1.10339	0.342709	0.788559	1.01388
	Sample2	17.3716	16.9808	0.628924	-0.131758	1.09563
	Sample3	17.2924	16.4619	0.549731	-0.210951	1.15745
20%stretch	Sample1	18.0625	16.6369	1.60806	0.847382	0.555792	0.540067
	Sample2	17.9069	16.4545	1.45242	0.691737	0.619108
	Sample3	18.3823	16.2721	1.92783	1.16715	0.445299
	Sample	Sox9	Ct Gapdh	∆Ct	∆∆Ct	2^-∆∆Ct	mean 2^-∆∆Ct
Control	Sample1	25.1168	18.143	7.10242	0.0517305	0.964778	1.00076
	Sample2	24.9875	17.9552	6.97313	-0.0775592	1.05523
	Sample3	25.0909	17.945	7.07651	0.0258287	0.982256
10%stretch	Sample1	25.1616	18.5307	6.7362	-0.314483	1.24357	1.39306
	Sample2	24.877	18.3759	6.4516	-0.599084	1.51475
	Sample3	24.9693	18.3695	6.54392	-0.506763	1.42086
Control	Sample1	33.5926	20.3805	13.2388	-0.485395	1.39997	1.03552
	Sample2	34.1207	20.3782	13.7669	0.0427157	0.970826
	Sample3	34.5207	20.3026	14.1669	0.442679	0.735767
20%stretch	Sample1	33.4851	17.5854	15.264	1.53977	0.343941	0.369211
	Sample2	32.8138	18.2211	14.5927	0.868508	0.547713
	Sample3	34.1564	18.8568	15.9352	2.21103	0.21598
	Sample	Col2	Ct Gapdh	∆Ct	∆∆Ct	2^-∆∆Ct	mean 2^-∆∆Ct
Control	Sample1	18.6617	14.4532	4.22239	0.0552069	0.962456	1.00036
	Sample2	18.5787	14.3953	4.13934	-0.0278505	1.01949
	Sample3	18.5792	14.4696	4.13983	-0.0273565	1.01914
10%stretch	Sample1	17.6592	14.8157	2.7712	-1.39599	2.63169	2.61655
	Sample2	17.5751	14.8636	2.68711	-1.48008	2.78963
	Sample3	17.7753	14.9848	2.88723	-1.27996	2.42833
Control	Sample1	34.8944	20.3805	14.5406	-0.163884	1.1203	1.01246
	Sample2	35.3861	20.3782	15.0323	0.327769	0.796768
	Sample3	34.8944	20.3026	14.5406	-0.163884	1.1203
20%stretch	Sample1	33.9862	17.5854	15.765	1.06054	0.479451	0.332563
	Sample2	34.5886	18.2211	16.3675	1.66296	0.31579
	Sample3	35.23	18.8568	17.0089	2.30439	0.202447
	Sample	Acan	Ct Gapdh	∆Ct	∆∆Ct	2^-∆∆Ct	mean 2^-∆∆Ct
Control	Sample1	30.5155	18.143	12.5011	-0.0102692	1.00714	1.0019
	Sample2	30.4222	17.9552	12.4078	-0.10355	1.07441
	Sample3	30.6396	17.945	12.6252	0.113819	0.924138
10%stretch	Sample1	29.4751	18.4629	10.8423	-1.66912	3.1802	3.5866
	Sample2	29.5051	18.6438	10.8722	-1.63917	3.11487
	Sample3	28.9857	18.7918	10.3528	-2.15858	4.46474
Control	Sample1	34.891	20.3805	14.5372	-0.451267	1.36724	1.03219
	Sample2	35.7821	20.3782	15.4283	0.439829	0.737222
	Sample3	35.3537	20.3026	14.9999	0.0114382	0.992103
20%stretch	Sample1	35.0906	17.5854	16.8694	1.88093	0.27151	0.252343
	Sample2	38.3142	18.2211	20.0931	5.1046	0.0290645
	Sample3	34.3411	18.8568	16.12	1.13145	0.456455
