# Supplementary material for: Mechanical response microRNA-145a-5p alleviates osteoarthritis by inhibiting inflammation and promoting chondrogenesis
Source: PeerJ. 2025 Aug 19;13:e19905. doi: 10.7717/peerj.19905 (PMC12372789; doi:10.7717/peerj.19905)
Supplement: Supplemental Information 2 [file peerj-13-19905-s002.xlsx]

## Sheet: HAC pcr
human chondrocyte	Sample	miR-145a-5p	Ct U6	∆Ct	∆∆Ct	2^-∆∆Ct	mean 2^-∆∆Ct
Ctrl	Sample1	17.2672	10.0648	7.18136	-0.0621376	1.04401	1.00048
	Sample2	17.368	10.112	7.28223	0.0387268	0.973514
	Sample3	17.3527	10.0806	7.26691	0.0234108	0.983904
IL-1b	Sample1	17.4902	9.80638	7.66467	0.421166	0.746821	0.772479
	Sample2	17.5367	9.85491	7.71113	0.467633	0.72315
	Sample3	17.3078	9.81538	7.48227	0.238772	0.847466
	Sample	Sox9	Ct gapdh	∆Ct	∆∆Ct	2^-∆∆Ct
Ctrl	Sample1	26.2372	14.2523	12.0802	0.0769647	0.94805	1.0013
	Sample2	26.1818	14.0821	12.0249	0.0216039	0.985137
	Sample3	26.0616	14.1364	11.9047	-0.0985686	1.07071
IL-1b	Sample1	26.8674	13.8748	13.1444	1.14108	0.453419	0.473225
	Sample2	26.6855	13.7193	12.9625	0.959214	0.514337
	Sample3	26.8722	13.575	13.1491	1.14586	0.451919
	Sample	Acan	Ct gapdh	∆Ct	∆∆Ct	2^-∆∆Ct
Ctrl	Sample1	22.207	14.2523	8.05003	0.159203	0.89552	1.00355
	Sample2	22.0255	14.0821	7.86857	-0.0222543	1.01555
	Sample3	21.9108	14.1364	7.75388	-0.136949	1.09958
IL-1b	Sample1	23.9064	13.8748	10.1834	2.29254	0.204116	0.190026
	Sample2	24.236	13.7193	10.513	2.6222	0.162419
	Sample3	23.9104	13.575	10.1874	2.29659	0.203543
	Sample	Col2	Ct gapdh	∆Ct	∆∆Ct	2^-∆∆Ct
Ctrl	Sample1	22.6181	14.1711	8.64142	0.130198	0.913706	1.00257
	Sample2	22.4807	13.8513	8.50401	-0.00721868	1.00502
	Sample3	22.3649	13.9076	8.38825	-0.122979	1.08898
IL-1b	Sample1	25.8708	13.8063	12.2622	3.751	0.0742742	0.0684961
	Sample2	25.9724	13.7935	12.3638	3.85261	0.0692229
	Sample3	26.1316	13.2258	12.523	4.0118	0.0619911

## Sheet:  Luciferase
	﻿Firefly luciferase								﻿Renilla luciferase								F/R									Relative Luciferase Activity
NC mimics+3'UTR-WT	43967.2	45271.7	44329.2	42442.5	41617.2	40914.4			76578.8	78065	108457	110586	98982.2	102042			0.574143	0.579923	0.408726	0.383796	0.420451	0.400956		0.461333		1.24453	1.25706	0.885968	0.831929	0.911384	0.869126
miR-145a-5p mimics+3'UTR-WT	30473.2	29712.3	27390.2	27242.8	48157.1	48361.9			88635.6	87229.5	66646.2	68989.1	155986	163983			0.343803	0.340622	0.410979	0.394886	0.308727	0.29492		0.34899		0.745239	0.738344	0.890852	0.855967	0.669207	0.639279
NC mimics+3'UTR-Mut	53821.7	50060.2	45906.5	42867.6	48903.1	57187			68295.5	66473.5	56163.3	53990.8	73146.2	93586.4			0.788071	0.753085	0.817375	0.79398	0.668567	0.611061		0.73869		1.06685	1.01949	1.10652	1.07485	0.905071	0.827223
miR-145a-5p mimics+3'UTR-Mut	78389.5	74489.3	77215.1	74222.7	51219	49919.1			86245.3	86246.4	91572.4	92013.7	69555.7	67898.2			0.908913	0.86368	0.843214	0.806648	0.736374	0.735205		0.815672		1.23044	1.16921	1.1415	1.092	0.996865	0.995283
