# Supplementary material for: Mechanical response microRNA-145a-5p alleviates osteoarthritis by inhibiting inflammation and promoting chondrogenesis
Source: PeerJ. 2025 Aug 19;13:e19905. doi: 10.7717/peerj.19905 (PMC12372789; doi:10.7717/peerj.19905)
Supplement: Supplemental Information 4 [file peerj-13-19905-s004.xlsx]

## Sheet: Figure1E
	Relative miR-145a-5p fluorescence intensity
	Sham	OA
Sample1	579139	296905
Sample2	526984	351376
Sample3	584294	304777
Sample4	581903	345066
Sample5	507487	340778
Sample6	635499	331331

## Sheet: Figure3B
	miR-145a-5p fluorescence intensity
	Ctrl	IL-1b
Sample1	14131.7	9797.2
Sample2	12604.8	9158.57
Sample3	14847.5	8904.86

## Sheet: Figure5F-G
			Fluorescence intensity
			miR-145a-5p	COL2	MMP13	OARSI
	Sham	Sample1	1705147	11754047	3821146	1
		Sample2	2012375	8479154	4906399	0.5
		Sample3	2386126	17088410	2750339	1
		Sample4	2427544	8307440	1030700	0.5
		Sample5	1790541	13714308	1654540	0
		Sample6	1818699	21181030	772609	0.5
	OA	Sample1	919053	9152964	10833419	3
		Sample2	885088	4103733	12634592	3.5
		Sample3	804611	4401576	10272372	4
		Sample4	1075676	7155806	6670306	4
		Sample5	841662	9477090	6950779	4.5
		Sample6	790926	6689596	13536961	3.5
	miR-NC	Sample1	1096062	5607357	17981699	3.5
		Sample2	1470994	9152964	7752123	4
		Sample3	1381595	7155806	13205161	4
		Sample4	802999	7126851	11067189	3
		Sample5	757835	9132130	16277955	4.5
		Sample6	1131100	10478007	13269483	4
	miR-145a-5p	Sample1	3866170	16980030	2209258	2
		Sample2	3924834	10393685	2604785	2.5
		Sample3	3316688	10480949	1223951	2
		Sample4	3805690	15154944	1396786	1.5
		Sample5	3225271	14989545	2038584	2
		Sample6	3243242	14785680	2653008	1.5
