# Supplementary material for: Mechanical response microRNA-145a-5p alleviates osteoarthritis by inhibiting inflammation and promoting chondrogenesis
Source: PeerJ. 2025 Aug 19;13:e19905. doi: 10.7717/peerj.19905 (PMC12372789; doi:10.7717/peerj.19905)
Supplement: Supplemental Information 5 [file peerj-13-19905-s005.xlsx]

## Sheet: MOUSE
Mouse primer sequences for qPCR
Target genes	Forward (5’-3’)	Reverse (5’-3’)
Gapdh	AGGTCGGTGTGAACGGATTTG	TGTAGACCATGTAGTTGAGGTCA
Sox9	GAGCCGGATCTGAAGAGGGA	GCTTGACGTGTGGCTTGTTC
Col2	GCTACACTCAAGTCACTGAACAACCA	TCAATCCAGTAGTCTCCGCTCTTCC
Acan	CCTGCTACTTCATCGACCCC	AGATGCTGTTGACTCGAACCT
Nrf2	TCTTGGAGTAAGTCGAGAAGTGT	GTTGAAACTGAGCGAAAAAGGC
Il-6	TAGTCCTTCCTACCCCAATTTCC	TTGGTCCTTAGCCACTCCTTC
U6	GCGCGTCGTGAAGCGTTC	GTGCAGGGTCCGAGGT
miR-145a-5p	GCGTCCAGTTTTCCCAGGA	GTGCAGGGTCCGAGGT

## Sheet: HUMAN
Human primer sequences for qPCR
Target genes	Forward (5’-3’)	Reverse (5’-3’)
Gapdh	AGAAGGCTGGGGCTCATTTG	AGGGGCCATCCACAGTCTTC
Sox9	AAGAACAAGCCGCACGTCAA	CCGTTCTTCACCGACTTCCTC
Col2	ATGAGGGCGCGGTAGAGAC	TCACAGACACAGATCCGGCA
Acan	ACTCTGGGTTTTCGTGACTCT	ACACTCAGCGAGTTGTCATGG
U6	GCTTCGGCAGCACATATACTAAAAT	CGCTTCACGAATTTGCGTGTCAT
Hsa-miR-145a-5p	GCGTCCAGTTTTCCCAGGA	CGCTTCACGAATTTGCGTGTCAT
