# Supplementary material for: Mechanical response microRNA-145a-5p alleviates osteoarthritis by inhibiting inflammation and promoting chondrogenesis
Source: PeerJ. 2025 Aug 19;13:e19905. doi: 10.7717/peerj.19905 (PMC12372789; doi:10.7717/peerj.19905)
Supplement: Supplemental Information 10 [file peerj-13-19905-s010.xls]

## Sheet: Sheet1
ITEM TO CHECK	IMPORTANCE	CHECKLIST
EXPERIMENTAL DESIGN
Definition of experimental and control groups	E	Line 117-168
Number within each group	E	Line 117-168
Assay carried out by core lab or investigator's lab?	D	Line 354-357
Acknowledgement of authors' contributions	D	Line 358-362
SAMPLE
Description	E	Line 117-168
Volume/mass of sample processed	D	√
Microdissection or macrodissection	E	√
Processing procedure	E	Line 125-129
If frozen - how and how quickly?	E	n/a
If fixed - with what, how quickly?	E	Line 125-129
Sample storage conditions and duration (especially for FFPE samples)	E	n/a
NUCLEIC ACID EXTRACTION
Procedure and/or instrumentation	E	Line 170-194
Name of kit and details of any modifications	E	√
Source of additional reagents used	D	√
Details of DNase or RNAse treatment	E	Line 170-194
Contamination assessment (DNA or RNA)	E	Line 170-194
Nucleic acid quantification	E	Line 170-194
Instrument and method	E	√
Purity (A260/A280)	D	√
Yield	D	n/a
RNA integrity method/instrument	E	Line 170-194
RIN/RQI or Cq of 3' and 5' transcripts	E	n/a
Electrophoresis traces	D	n/a
Inhibition testing (Cq dilutions, spike or other)	E	n/a
REVERSE TRANSCRIPTION
Complete reaction conditions	E	Line 170-194
Amount of RNA and reaction volume	E	√
Priming oligonucleotide (if using GSP) and concentration	E	n/a
Reverse transcriptase and concentration	E	√
Temperature and time	E	√
Manufacturer of reagents and catalogue numbers	D	√
Cqs with and without RT	D*	n/a
Storage conditions of cDNA	D	Line 170-194
qPCR TARGET INFORMATION
If multiplex, efficiency and LOD of each assay.	E	n/a
Sequence accession number	E	Line 170-194 Table 1
Location of amplicon	D	n/a
Amplicon length	E	n/a
In silico specificity screen (BLAST, etc)	E	n/a
Pseudogenes, retropseudogenes or other homologs?	D	n/a
Sequence alignment	D	n/a
Secondary structure analysis of amplicon	D	n/a
Location of each primer by exon or intron (if applicable)	E	n/a
What splice variants are targeted?	E	n/a
qPCR OLIGONUCLEOTIDES
Primer sequences	E	Line 170-194 Table 1
RTPrimerDB Identification Number	D	n/a
Probe sequences	D**	n/a
Location and identity of any modifications	E	n/a
Manufacturer of oligonucleotides	D	Line 170-194 Table 1
Purification method	D	n/a
qPCR PROTOCOL
Complete reaction conditions	E	Line 170-194
Reaction volume and amount of cDNA/DNA	E	√
Primer, (probe), Mg++ and dNTP concentrations	E	n/a
Polymerase identity and concentration	E	n/a
Buffer/kit identity and manufacturer	E	√
Exact chemical constitution of the buffer	D	n/a
Additives (SYBR Green I, DMSO, etc.)	E	√
Manufacturer of plates/tubes and catalog number	D	n/a
Complete thermocycling parameters	E	Line 170-194
Reaction setup (manual/robotic)	D	Line 170-194
Manufacturer of qPCR instrument	E	Line 170-194
qPCR VALIDATION
Evidence of optimisation (from gradients)	D	n/a
Specificity (gel, sequence, melt, or digest)	E	n/a
For SYBR Green I, Cq of the NTC	E	n/a
Standard curves with slope and y-intercept	E	n/a
PCR efficiency calculated from slope	E	n/a
Confidence interval for PCR efficiency or standard error	D	n/a
r2 of standard curve	E	n/a
Linear dynamic range	E	n/a
Cq variation at lower limit	E	n/a
Confidence intervals throughout range	D	n/a
Evidence for limit of detection	E	n/a
If multiplex, efficiency and LOD of each assay.	E	n/a
DATA ANALYSIS
qPCR analysis program (source, version)	E	n/a
Cq method determination	E	√
Outlier identification and disposition	E	n/a
Results of NTCs	E	n/a
Justification of number and choice of reference genes	E	Line 170-194
Description of normalisation method	E	Line 170-194
Number and concordance of biological replicates	D	Line 170-194
Number and stage (RT or qPCR) of technical replicates	E	Line 170-194
Repeatability (intra-assay variation)	E	n/a
Reproducibility (inter-assay variation, %CV)	D	n/a
Power analysis	D	n/a
Statistical methods for result significance	E	Line 195-200
Software (source, version)	E	Line 195-200
Cq or raw data submission using RDML	D	n/a
Table 1. MIQE checklist for authors, reviewers and editors. All essential information (E) must be submitted with the manuscript. Desirable
information (D) should be submitted if available. If using primers obtained from RTPrimerDB, information on qPCR target, oligonucleotides,
protocols and validation is available from that source.
*: Assessing the absence of DNA using a no RT assay is essential when first extracting RNA. Once the sample has been validated as
RDNA-free, inclusion of a no-RT control is desirable, but no longer essential.
**: Disclosure of the probe sequence is highly desirable and strongly encouraged. However, since not all commercial pre-designed assay
vendors provide this information, it cannot be an essential requirement. Use of such assays is advised against.
